# Supplementary material
Source: PubMed Central journal article supplement (PMC5964039)

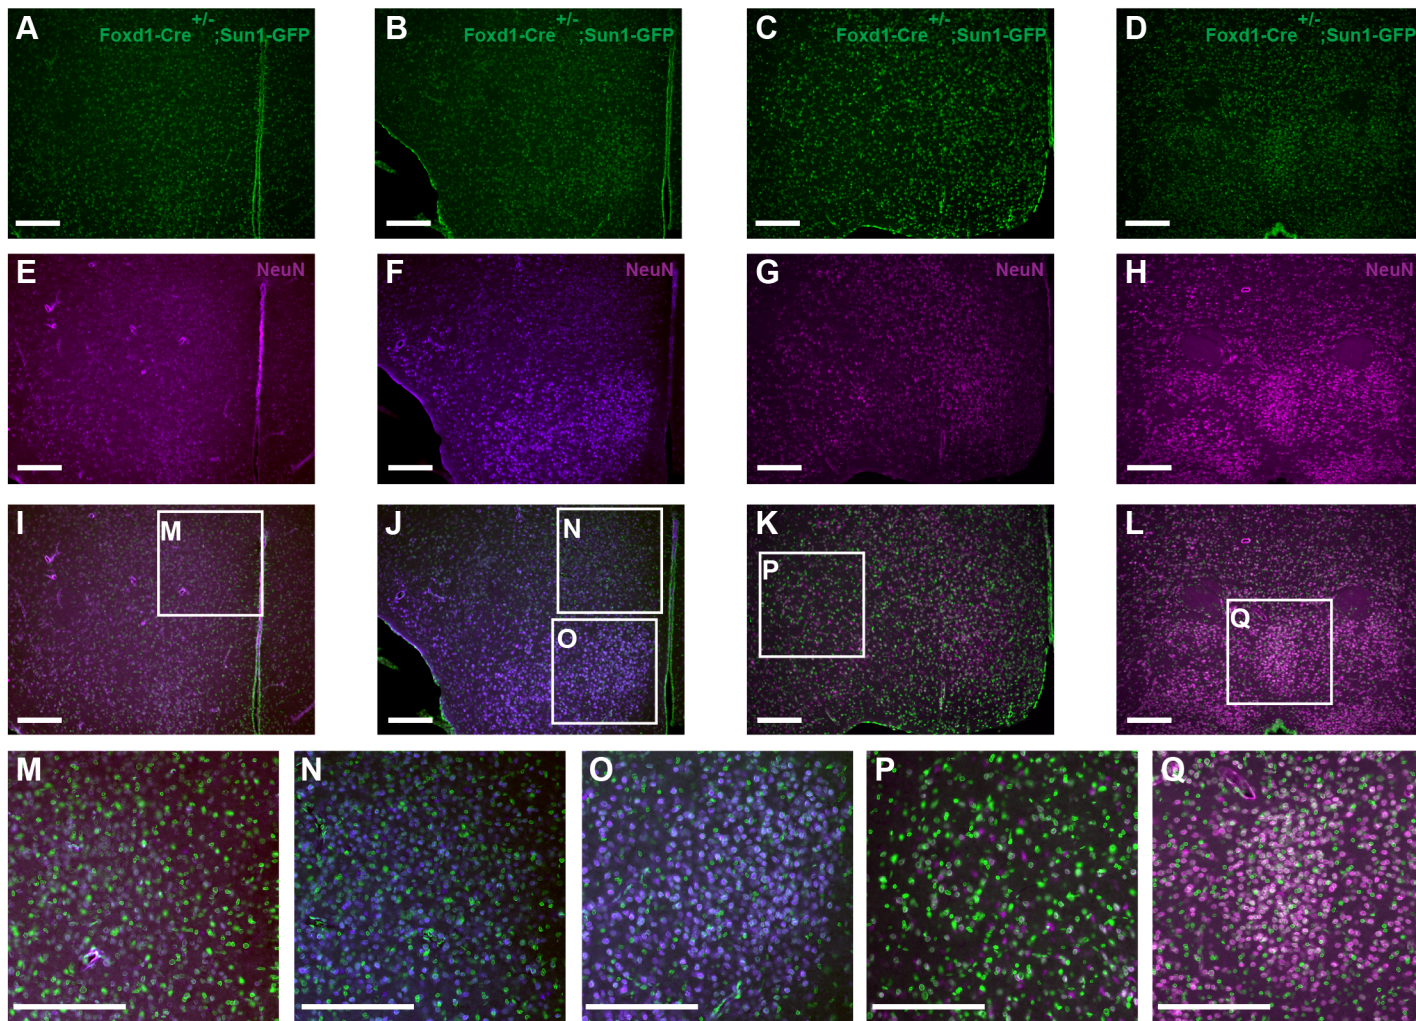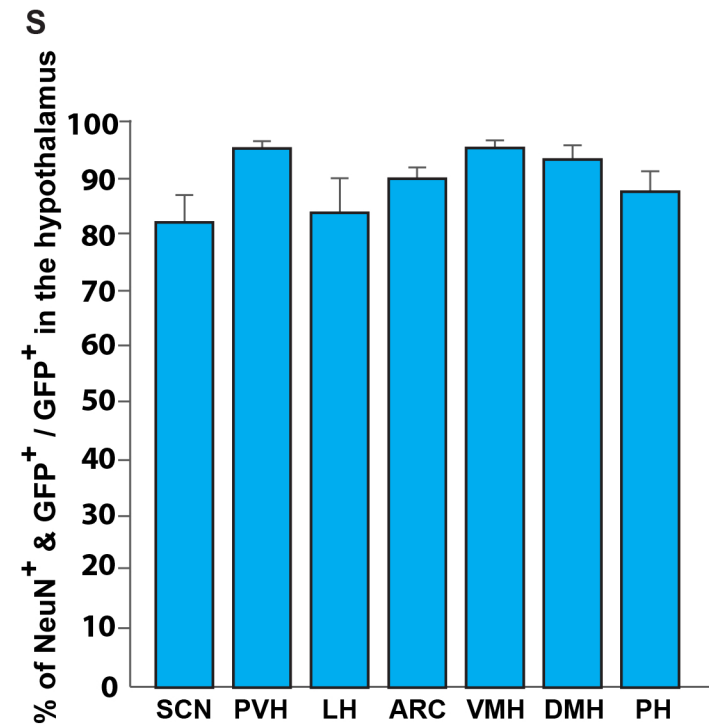

Supplement: NIHMS963843-supplement-1.pdf [file NIHMS963843-supplement-1.pdf]

Foxg1

Control

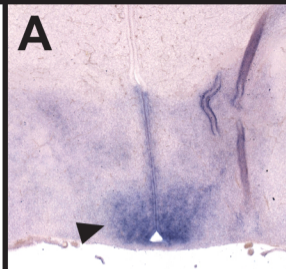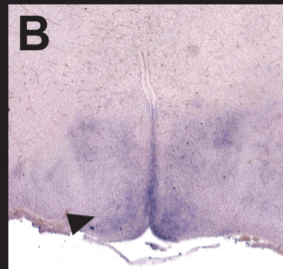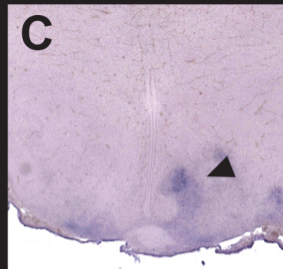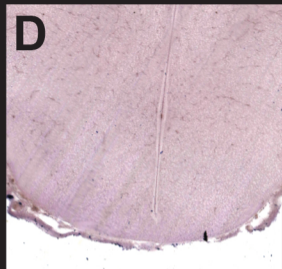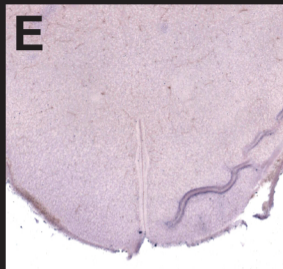

Foxd1 KO

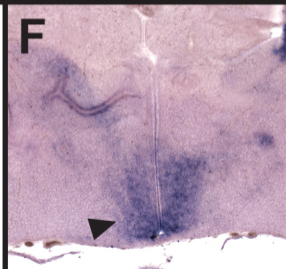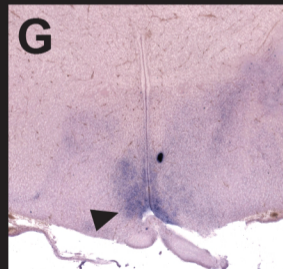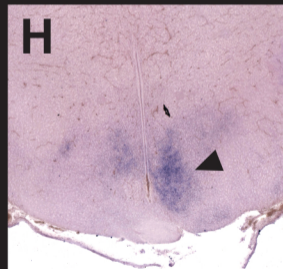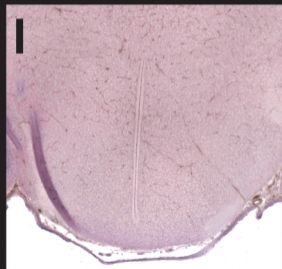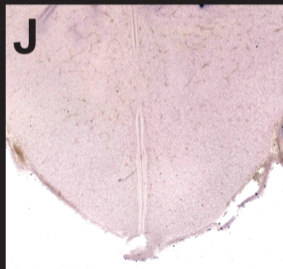

Newman, et al. Fig. S2

Supplement: NIHMS963843-supplement-2.pdf [file NIHMS963843-supplement-2.pdf]
